# Supplementary material
Source: MDPI journal article supplement (https://www.mdpi.com/2075-163X/10/7/634)
Supplement: s1 [file s1]

## Supporting Information to:

# Simultaneous Quantification of Forsterite Content and Minor–Trace Elements in Olivine by LA–ICP–MS and Geological applications in Emeishan large igneous province

Shitou Wu <sup>1,2\*</sup>, Yadong Wu <sup>1,2</sup>, Yueheng Yang <sup>1,2</sup>, Hao Wang <sup>1,2</sup>, Chao Huang <sup>1,2</sup>, Liewen Xie <sup>1,2</sup> and Jinhui Yang <sup>1,2</sup>

<sup>1</sup> State Key Laboratory of Lithospheric Evolution, Institute of Geology and Geophysics, Chinese Academy of Sciences, Beijing 100029, P.R. China

<sup>2</sup> Innovation Academy for Earth Science, Chinese Academy of Sciences, Beijing 100029, P.R. China.

\* Correspondence: shitou.wu@mail.iggcas.ac.cn; Tel.: +86-010-82998670

## EPMA

The olivines in the Dali, Pingchuan, and Lijiang picrites were analyzed using a JEOL 8230 instrument at the East China University of Technology, Nanchang, China. The operating conditions were a 20 kV accelerating voltage, 300 nA beam current, and 3  $\mu\text{m}$  electron beam. ZAF corrections were used to convert k-ratios to concentrations. The peak counting times were 40 s for Fe and 20 s for Mg and Si. The background counting times were half those of the peak times. Analytical spots in olivine were at least ca. 30  $\mu\text{m}$  from the mineral edges, in order to avoid any effect from secondary fluorescence on the target signal intensities. The RMs used for quantification were rhodonite for  $\text{SiO}_2$ , almandine garnet for FeO, and olivine for MgO. The precision and accuracy during the analytical sessions were monitored by replicate analyses of olivine RM MongOLSh11-2, which was analyzed as an unknown 2 times after every batch of 20 measurements. The mean  $\text{SiO}_2$ , FeO, and MgO contents and calculated Fo values for MongOLSh11-2 were  $40.68 \pm 0.37 \text{ wt.}\%$ ,  $10.11 \pm 0.07 \text{ wt.}\%$ ,  $48.83 \pm 0.26 \text{ wt.}\%$ , and  $89.60 \pm 0.07$  (2 sd;  $N = 64$ ), respectively. These values are consistent with the recommended values. In this study, the EPMA technique was used to validate the Fo values obtained by LA–ICP–MS.

**Table S1.** Reference values for GOR132-G. MgO and FeO (t) are given with a unit of *wt.%* and all others are given by  $\mu\text{g g}^{-1}$ . “\*” represents the information values.

|         | Mass fraction | Uncertainty (2 ) |
|---------|---------------|------------------|
| MgO     | 22.4          | 0.2              |
| FeO (t) | 10.1          | 0.1              |
| Li      | 8.9           | 1.2              |
| Na      | 6157          | 297              |
| Al      | 58216         | 1058             |
| P*      | 216           | 72               |
| Ca      | 50659         | 719              |
| Sc      | 36.5          | 1.2              |
| Ti      | 1835          | 78               |
| V       | 214           | 17               |
| Cr      | 2528          | 183              |
| Mn      | 1193          | 50               |
| Co      | 92.7          | 5.7              |

|    |      |      |
|----|------|------|
| Ni | 1187 | 58   |
| Cu | 205  | 21   |
| Zn | 76.8 | 12.5 |
| Ga | 10.4 | 0.9  |
| Y  | 12.9 | 0.5  |

The data were taken from the GeoReM database (<http://georem.mpch-mainz.gwdg.de/>) [1, 2]

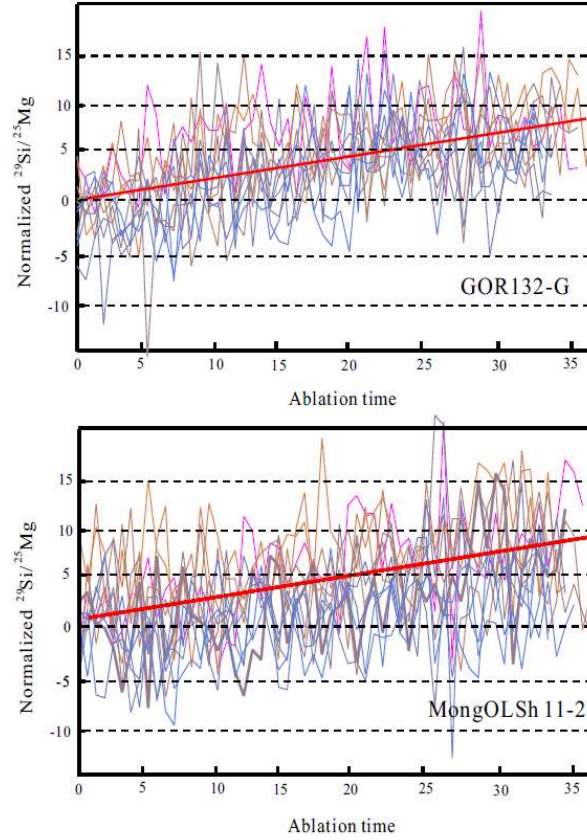

**Figure S1.** Comparison of down-hole fractionation (DHF) of Si/Mg in GOR132-G glass and MongOL Sh11-2 olivine. Laser spot size is 44  $\mu\text{m}$ . In order to compare at the same scale, the  $^{29}\text{Si}/^{25}\text{Mg}$  ratios are normalized to the mean value of initial two seconds.

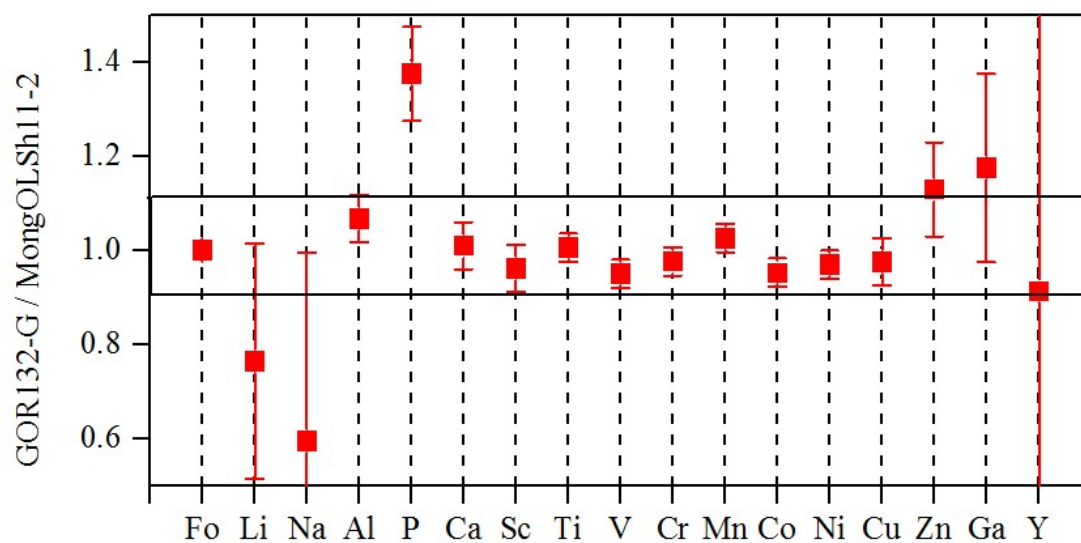

**Figure S2.** Results of Fo contents and minor-trace element in one Lijiang olivine quantified using GOR132-G and MongOLSh11-2 as calibration standards. The results show the data calibrated by GOR132-G match with the data by MongOLSh11-2 within 10%, except Li, Na, P, Zn, and Ga.

#### Reference:

1. Jochum, K. P.; Nohl, U.; Herwig, K.; Lammel, E.; Stoll, B.; Hofmann, A. W. *Geostand. Geoanal. Res.*, **2005**, 29, 333.
2. Jochum, K. P.; Nohl, U. *Chem. Geol.*, **2008**, 253, 50.
